# Supplementary material for: Role of the Heme Activator Protein Complex in the Sexual Development of Cryptococcus neoformans
Source: mSphere. 2022 May 31;7(3):e00170-22. doi: 10.1128/msphere.00170-22 (PMC9241503; doi:10.1128/msphere.00170-22)
Supplement: FIG S3 [file msphere.00170-22-sf003.pdf]

Fig S3

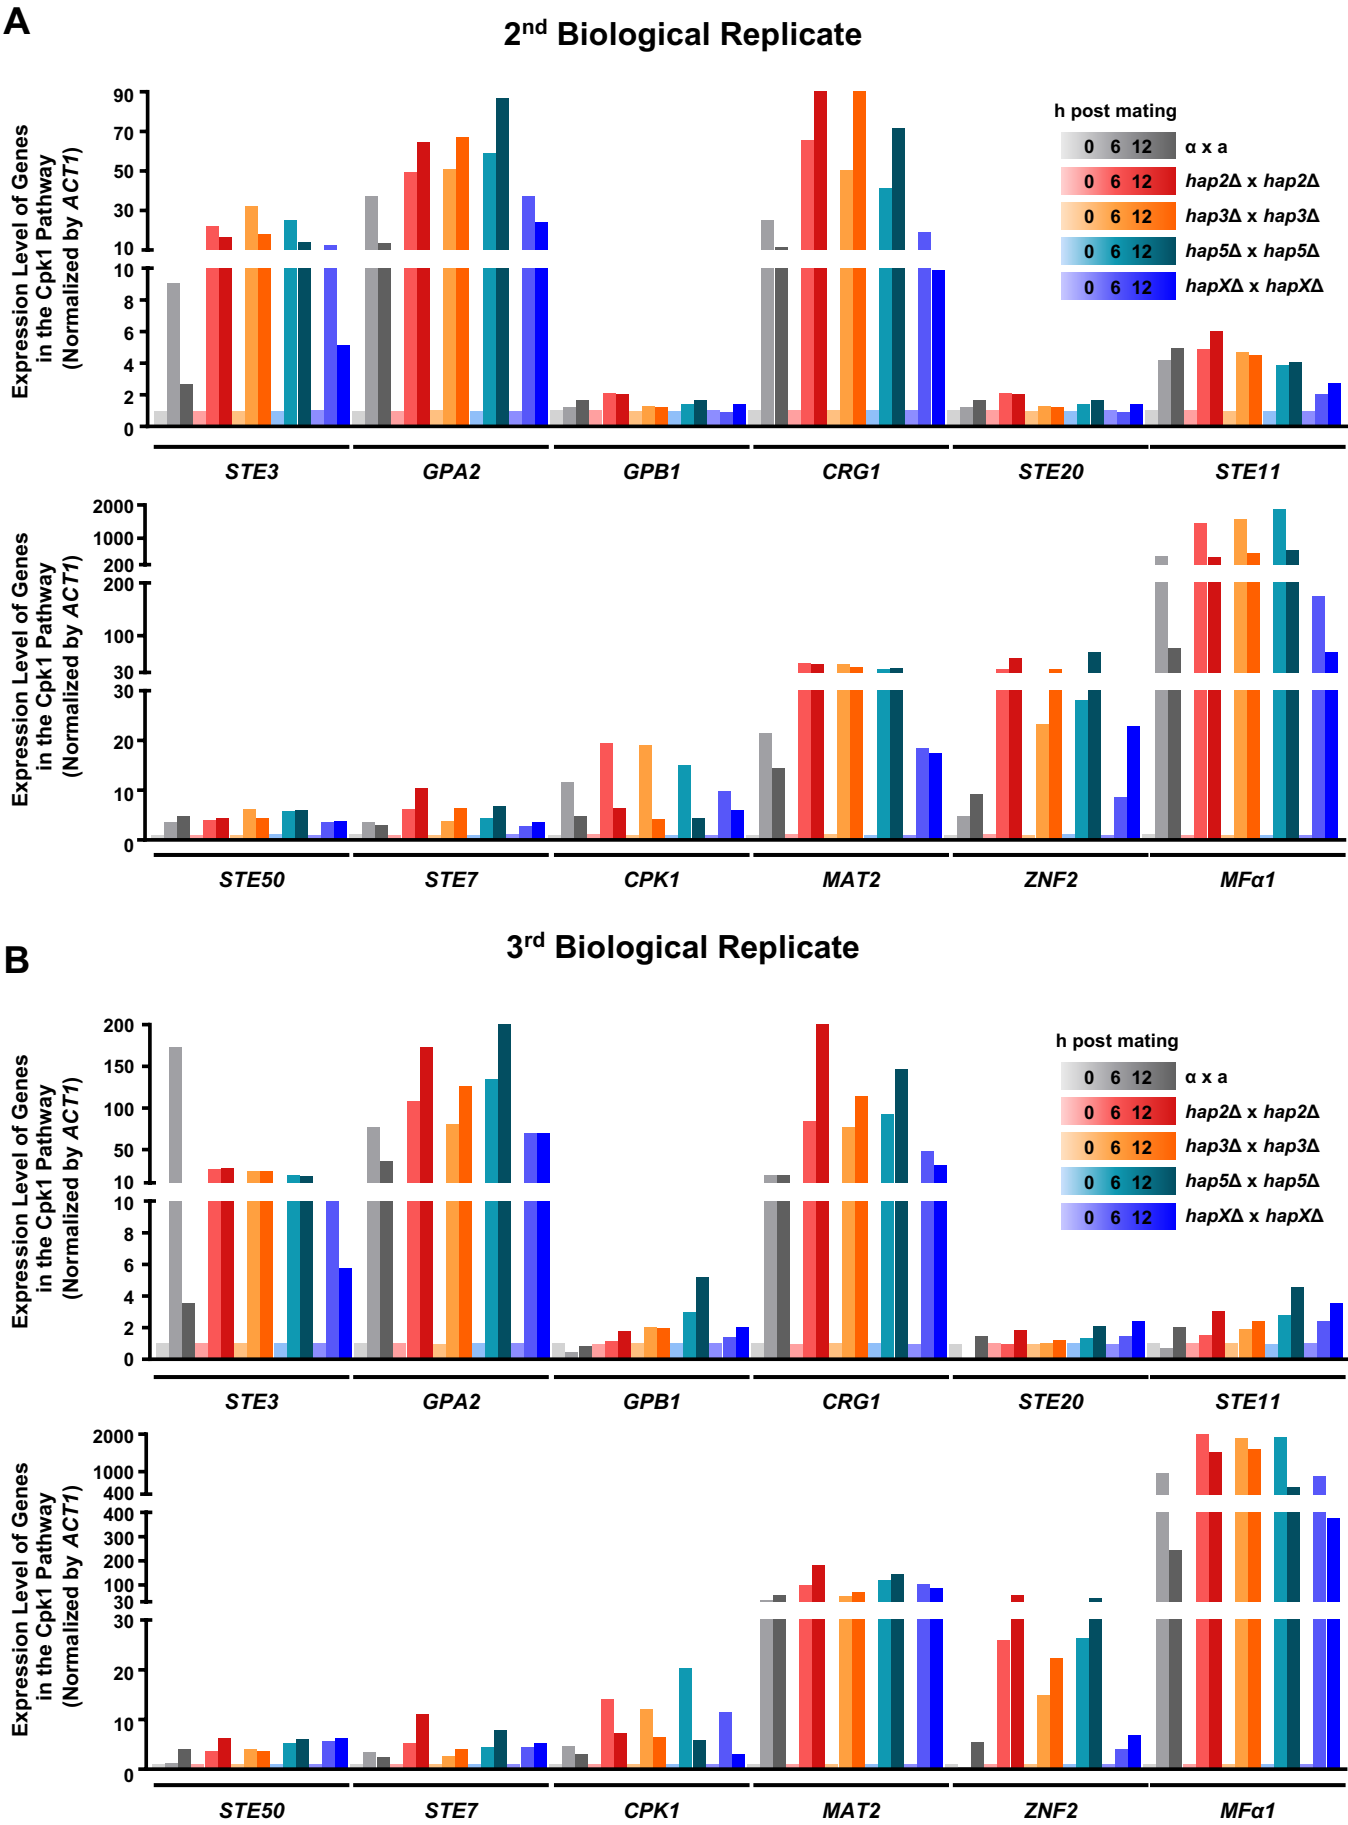

**Fig. S3. Expression levels of genes in the Cpk1 pathway during bilateral mating of HAP complex mutant strains**

qRT-PCR was used to monitor the expression levels of various genes in the Cpk1 pathway using RNA isolated from co-cultures of HAP mutants on V8 medium. RNA was isolated from co-cultures at 0, 6, and 12 h following mating, and the expression levels of these genes were normalized to the expression levels of the housekeeping gene *ACT1*. The expression levels of these genes at 0 h were set at 1. (A) Results for the second biological replicate and (B) third biological replicate of this experiment.
