# Supplementary material for: Role of the Heme Activator Protein Complex in the Sexual Development of Cryptococcus neoformans
Source: PubMed Central journal article supplement (PMC9241503; doi:10.1128/msphere.00170-22), 2022-05-31
Supplement: msphere.00170-22-sf001.pdf [file msphere.00170-22-sf001.pdf]

**Fig S1**

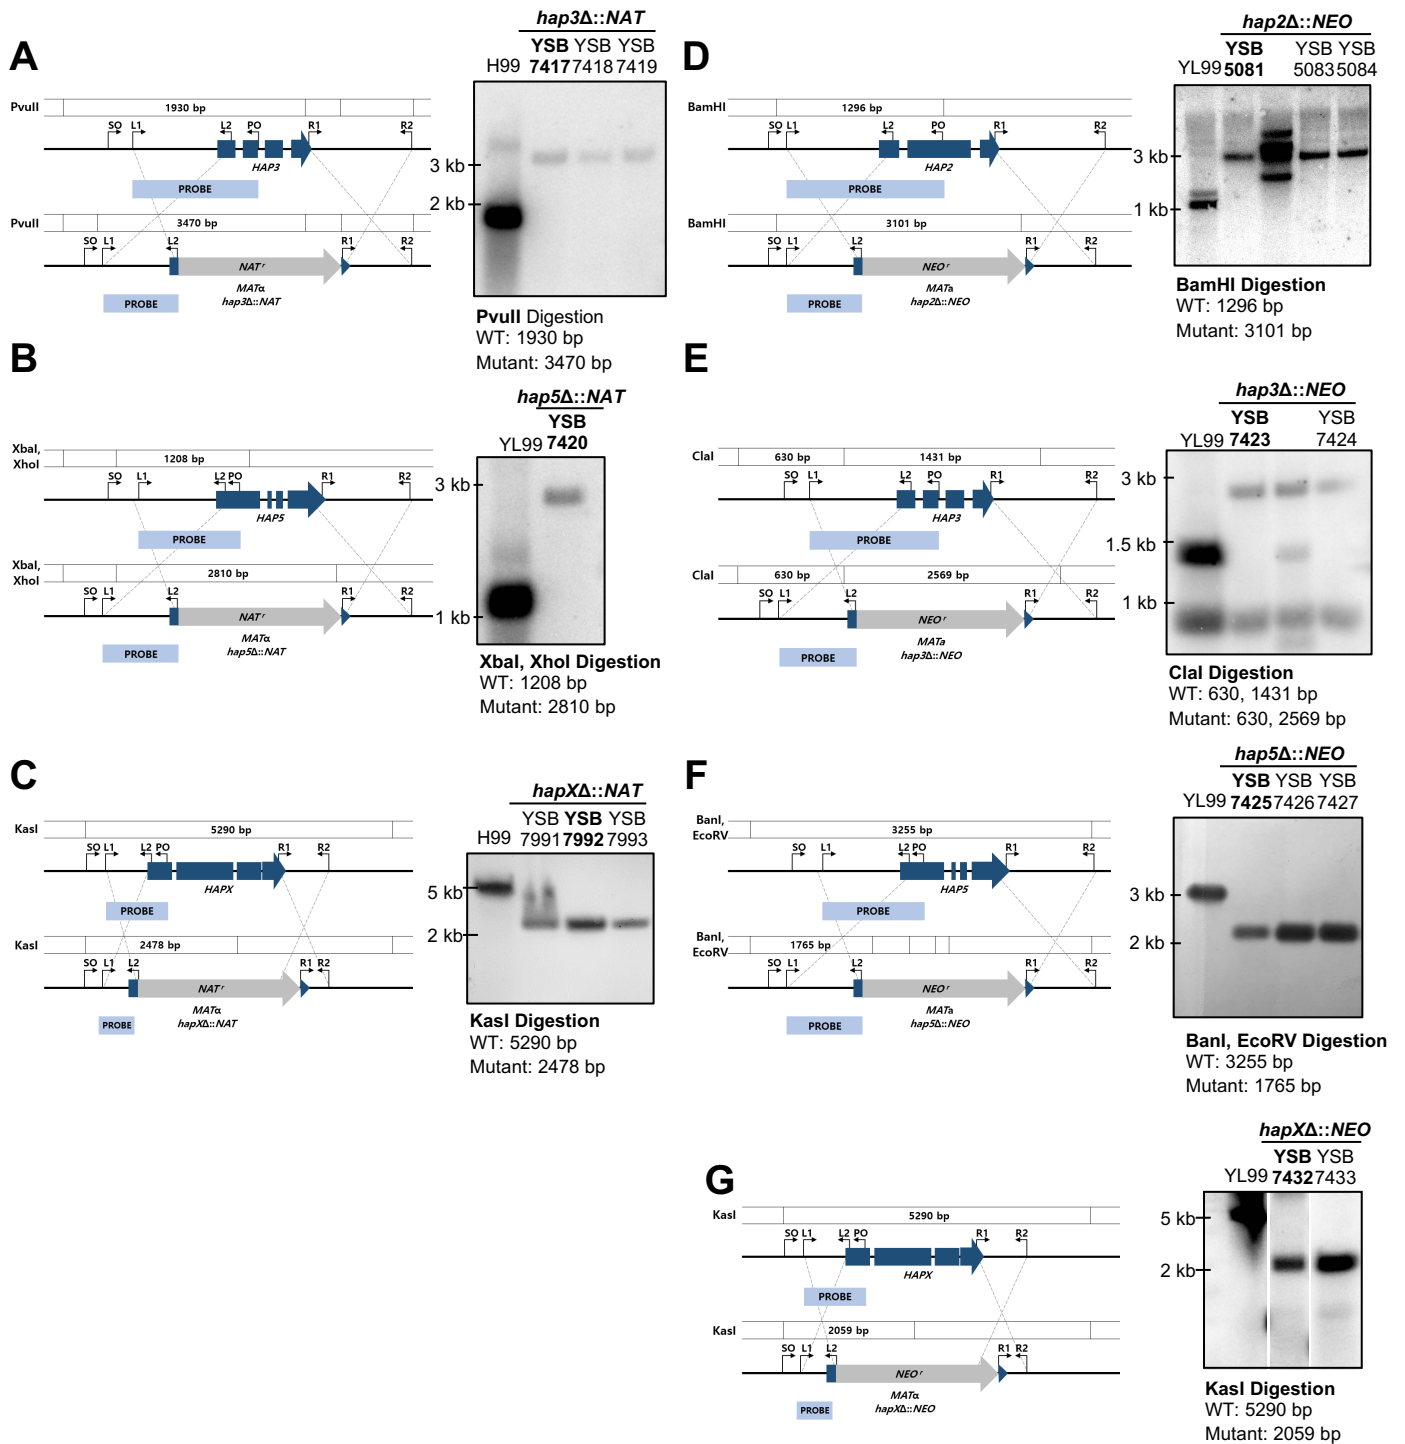

**Fig. S1. Disruption of *Cryptococcus neoformans* HAP complex in serotype A *MATα* H99 and *MATα* YL99**

Disruption of the *HAP3*, *HAP5*, and *HAPX* genes in the *MATα* H99 strain (A-C) and *HAP2*, *HAP3*, *HAP5*, and *HAPX* genes in the *MATα* YL99 strain (D-G). The correct gene disruption was verified by Southern blot analysis using genomic DNAs digested with the indicated restriction enzymes. The representative strains used in this study are shown in bold.
