# Supplementary material for: Role of the Heme Activator Protein Complex in the Sexual Development of Cryptococcus neoformans
Source: PubMed Central journal article supplement (PMC9241503; doi:10.1128/msphere.00170-22), 2022-05-31
Supplement: msphere.00170-22-sf002.pdf [file msphere.00170-22-sf002.pdf]

Fig S2

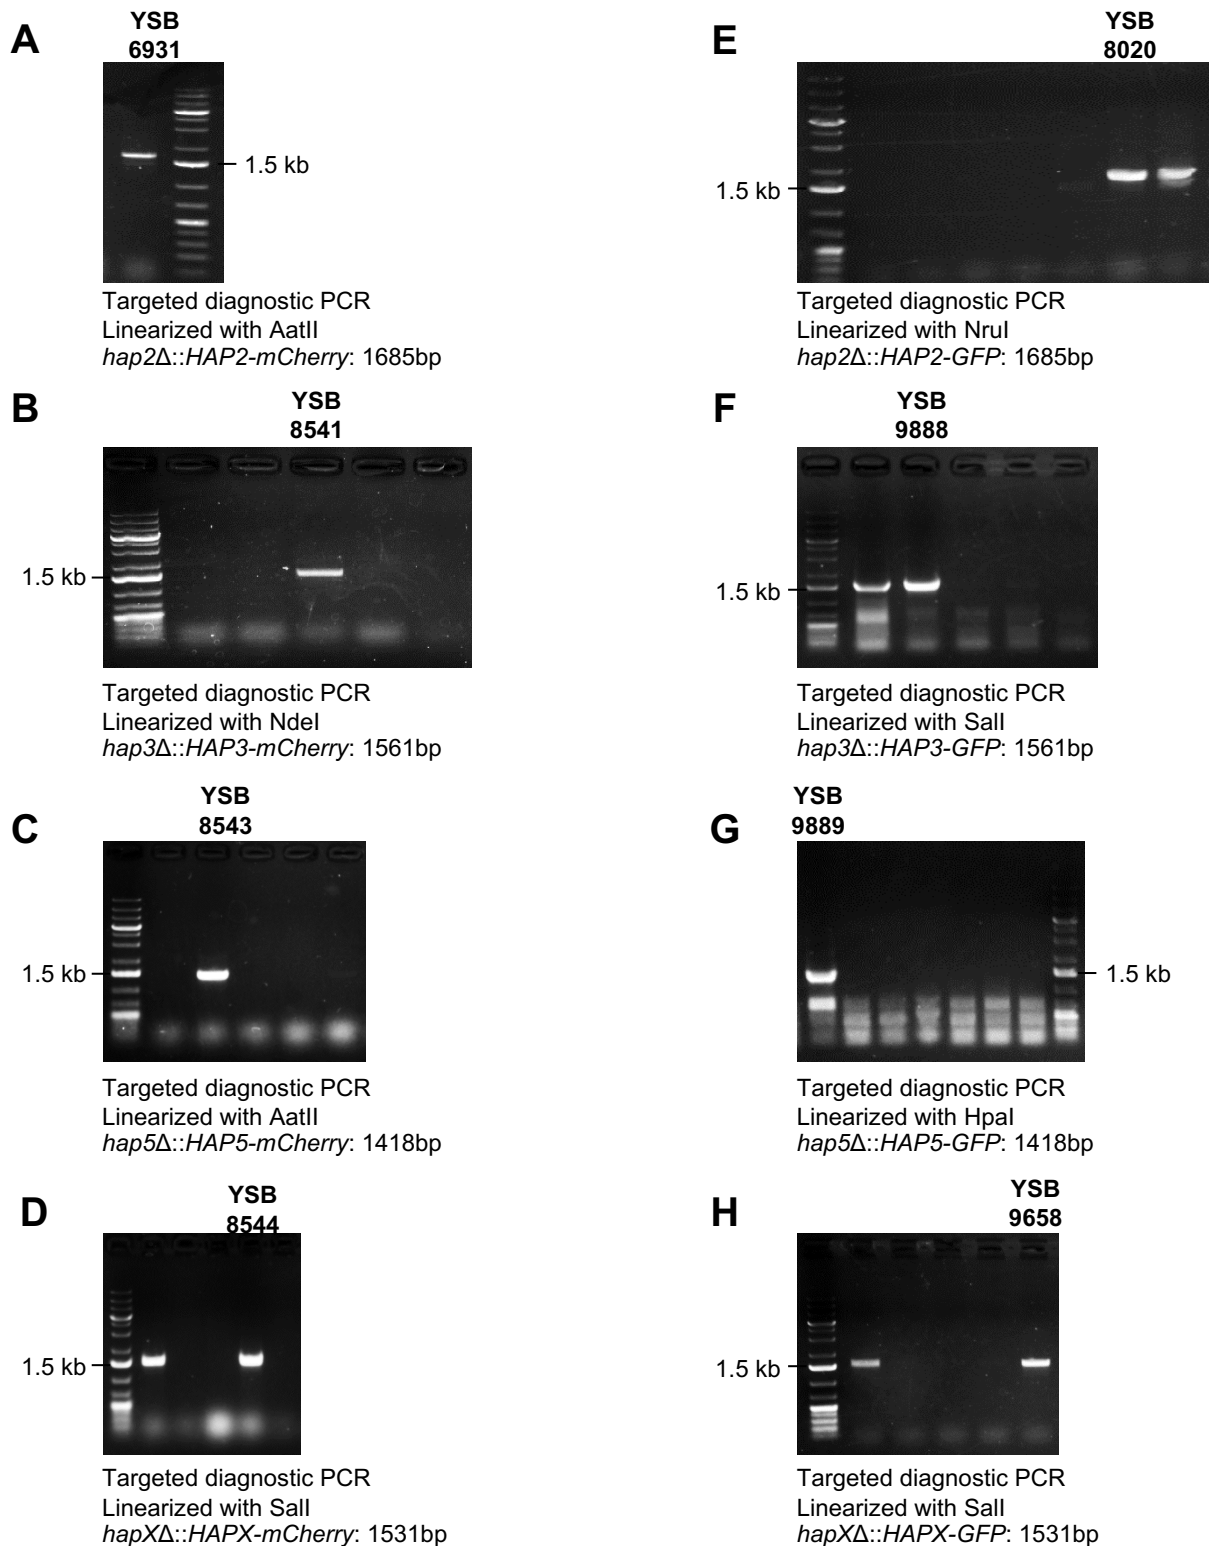

**Fig. S2. Construction of HAP complex-complemented strains in serotype A *MATα* H99 and *MATα* YL99**

The complemented strains were confirmed via targeted diagnostic PCR, using the specific primer pairs listed in Table S2.
