# Supplementary material for: Role of the Heme Activator Protein Complex in the Sexual Development of Cryptococcus neoformans
Source: PubMed Central journal article supplement (PMC9241503; doi:10.1128/msphere.00170-22), 2022-05-31
Supplement: msphere.00170-22-sf004.pdf [file msphere.00170-22-sf004.pdf]

**Fig S4**

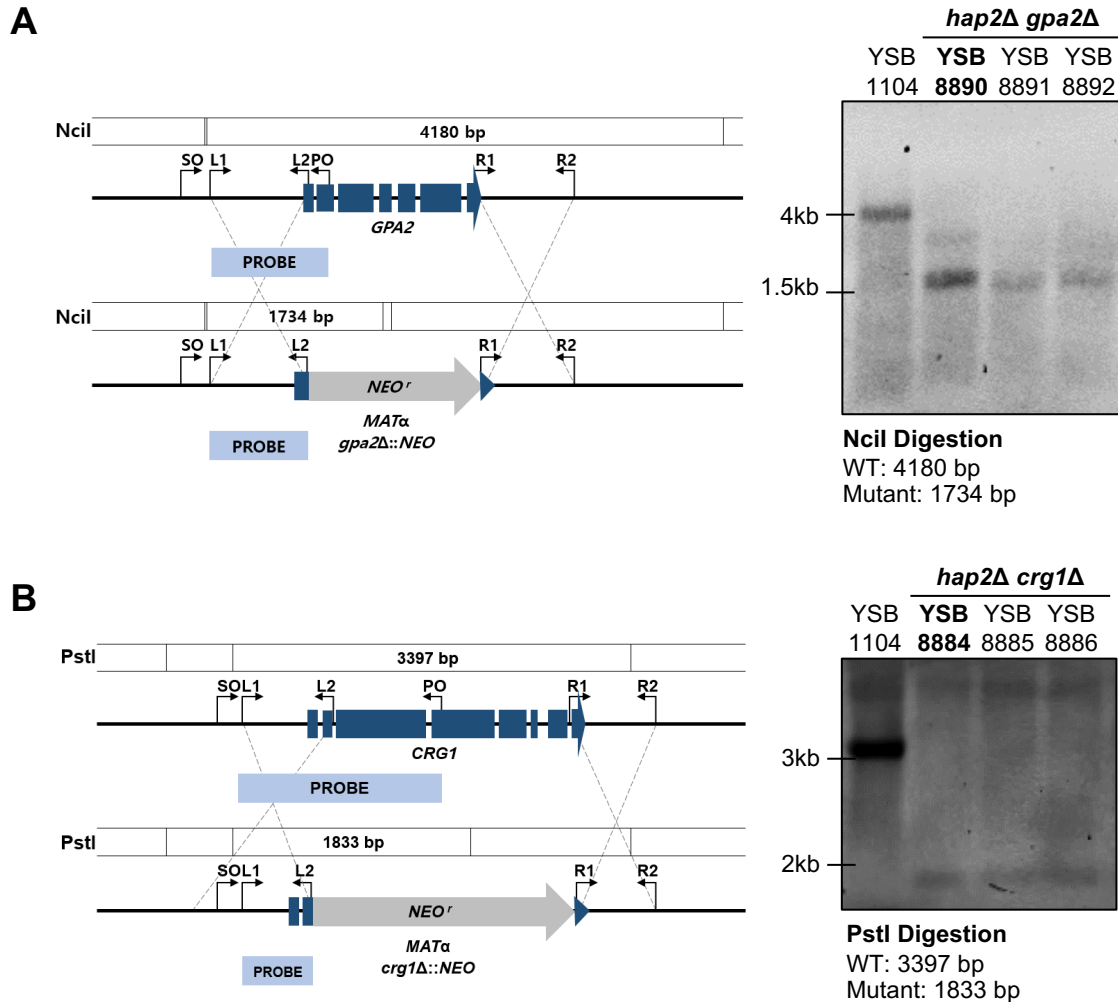

**Fig. S4. The construction of *hap2Δ gpa2Δ* and *hap2Δ crg1Δ* mutant strains.**

(A) Schematic representation of the *GPA2* disruption strategy and confirmation of the deletion of the *GPA2* gene in the *MATα hap2Δ* (YSB1104) mutant strain through Southern blot analysis. (B) Schematic representation of *CRG1* disruption strategy and confirmation of the deletion of the *CRG1* gene in *hap2Δ* mutant strain through Southern blot analysis.
