# Supplementary material for: Role of the Heme Activator Protein Complex in the Sexual Development of Cryptococcus neoformans
Source: PubMed Central journal article supplement (PMC9241503; doi:10.1128/msphere.00170-22), 2022-05-31
Supplement: msphere.00170-22-sf005.pdf [file msphere.00170-22-sf005.pdf]

**Fig S5**

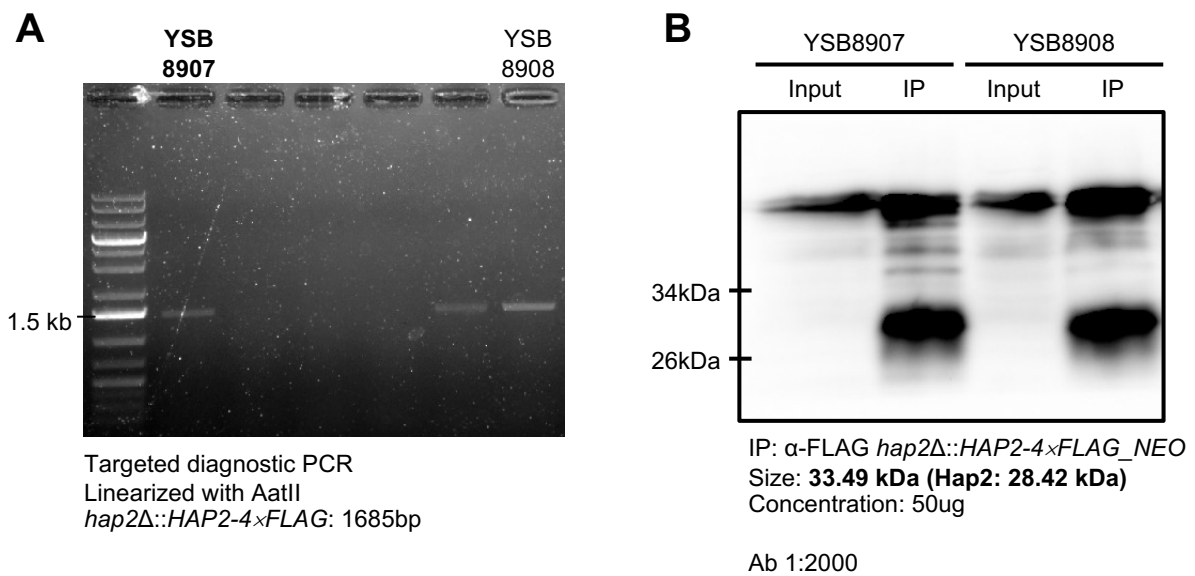

**Fig. S5. Construction of FLAG-tagged Hap2 strain**

(A) The targeted reintegration of the pHAP2-4×FLAG plasmid to *MAT $\alpha$  hap2 $\Delta$*  (YSB1104) was confirmed using diagnostic PCR. (B) The functionality of the constructed strain was tested using immunoprecipitation of the Hap2-4×FLAG protein with an anti-FLAG antibody (IP:  $\alpha$ -FLAG).
