# Supplementary material for: Role of the Heme Activator Protein Complex in the Sexual Development of Cryptococcus neoformans
Source: PubMed Central journal article supplement (PMC9241503; doi:10.1128/msphere.00170-22), 2022-05-31
Supplement: msphere.00170-22-sf006.pdf [file msphere.00170-22-sf006.pdf]

## Fig S6

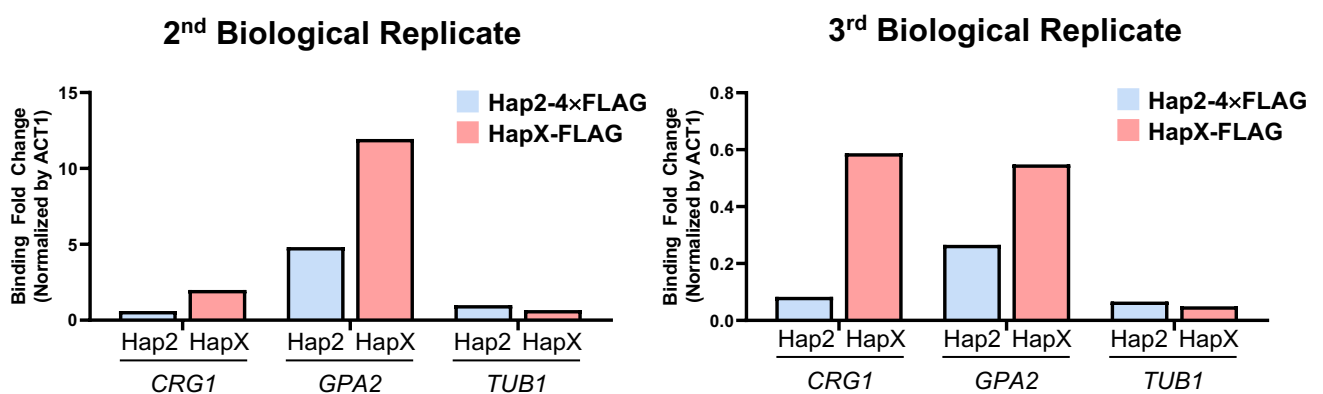

**Fig S6. Binding of Hap2 and HapX to *CRG1* and *GPA2* Promoters**

Three biological replicates of ChIP-qPCR were used to examine the binding of the Hap2-4xFLAG and HapX-FLAG strains to the promoters of *CRG1*, *GPA2*, and *TUB1*. ChIP-qPCR was performed under basal conditions for strains *MAT $\alpha$  hap2 $\Delta$ ::HAP2-4xFLAG* (YSB8907) and *MAT $\alpha$  hapX $\Delta$ ::HAPX-FLAG* (1). The fold changes in binding of Hap2 and HapX to *CRG1*, *GPA2*, and *TUB1* were calculated as follows:  $2^{-[IP(\text{Gene-Actin}) - WCE(\text{Gene-Actin})]}$ .

1. Do E, Cho YJ, Kim D, Kronstad JW, Jung WH. 2020. A transcriptional regulatory map of iron homeostasis reveals a new control circuit for capsule formation in *Cryptococcus neoformans*. *Genetics* 215:1171-1189.
