# Supplementary material for: Role of the Heme Activator Protein Complex in the Sexual Development of Cryptococcus neoformans
Source: PubMed Central journal article supplement (PMC9241503; doi:10.1128/msphere.00170-22), 2022-05-31
Supplement: msphere.00170-22-sf007.pdf [file msphere.00170-22-sf007.pdf]

**Fig S7**

**Expression Level of the HAP complex During Mating**

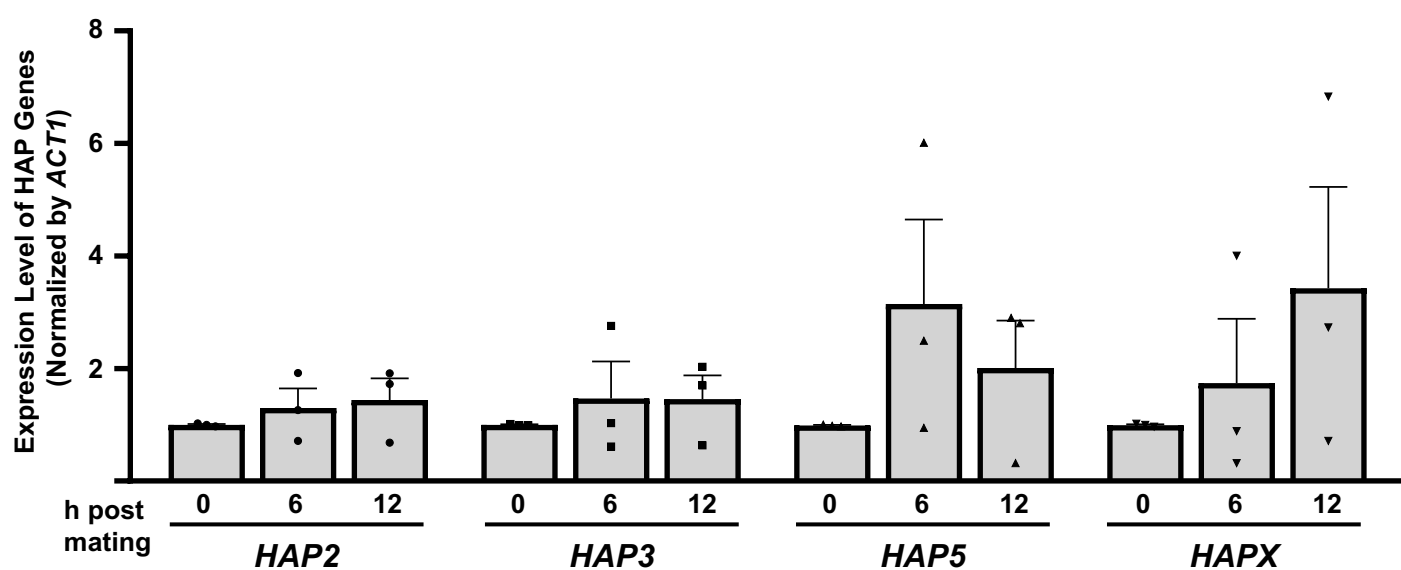

**Fig S7. Transcriptional regulation of the HAP complex during mating.**

The  $\alpha$  (H99) and  $a$  (YL99) strains were cultured in liquid YPD medium at 30°C overnight. The cells were co-incubated for 0, 6, and 12 h on V8 medium and scraped at the corresponding time points. The expression of each HAP complex gene was examined using qRT-PCR by normalizing the gene expression levels with *ACT1*.
