# Supplementary material for: Role of the Heme Activator Protein Complex in the Sexual Development of Cryptococcus neoformans
Source: PubMed Central journal article supplement (PMC9241503; doi:10.1128/msphere.00170-22), 2022-05-31
Supplement: msphere.00170-22-sf008.pdf [file msphere.00170-22-sf008.pdf]

**Fig S8**

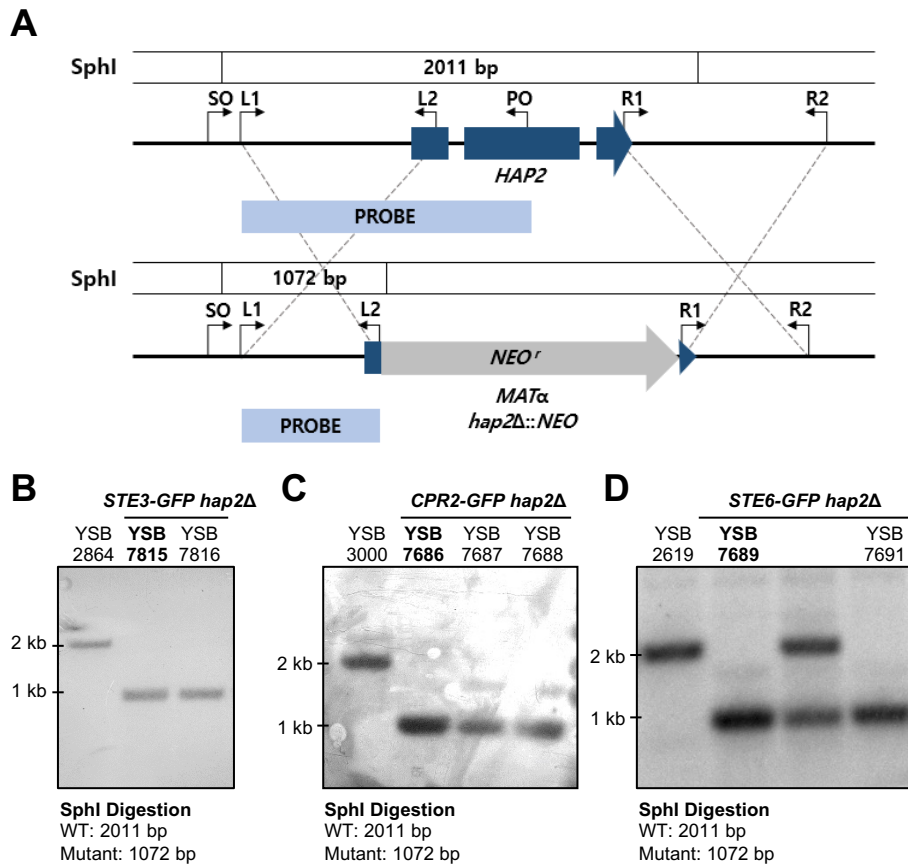

**Fig S8. Construction of *STE3-GFP hap2Δ*, *CPR2-GFP hap2Δ*, and *STE6-GFP hap2Δ* mutant strains**

(A) Diagram of the *HAP2* gene disruption strategy in the *MATα STE3-GFP*, *MATα CPR2-GFP*, and *MATα STE6-GFP hap2Δ* strain. (B-D) Confirmation of the *STE3-GFP hap2Δ*, *CPR2-GFP hap2Δ*, and *STE6-GFP hap2Δ* gene disruption using Southern blot analysis.
